# Supplementary material
Source: PubMed Central journal article supplement (PMC2651250)
Supplement: 0810635106_0810635106SI.pdf [file 0810635106_0810635106SI.pdf]

# Supporting Information

Fraser et al. 10.1073/pnas.0810635106

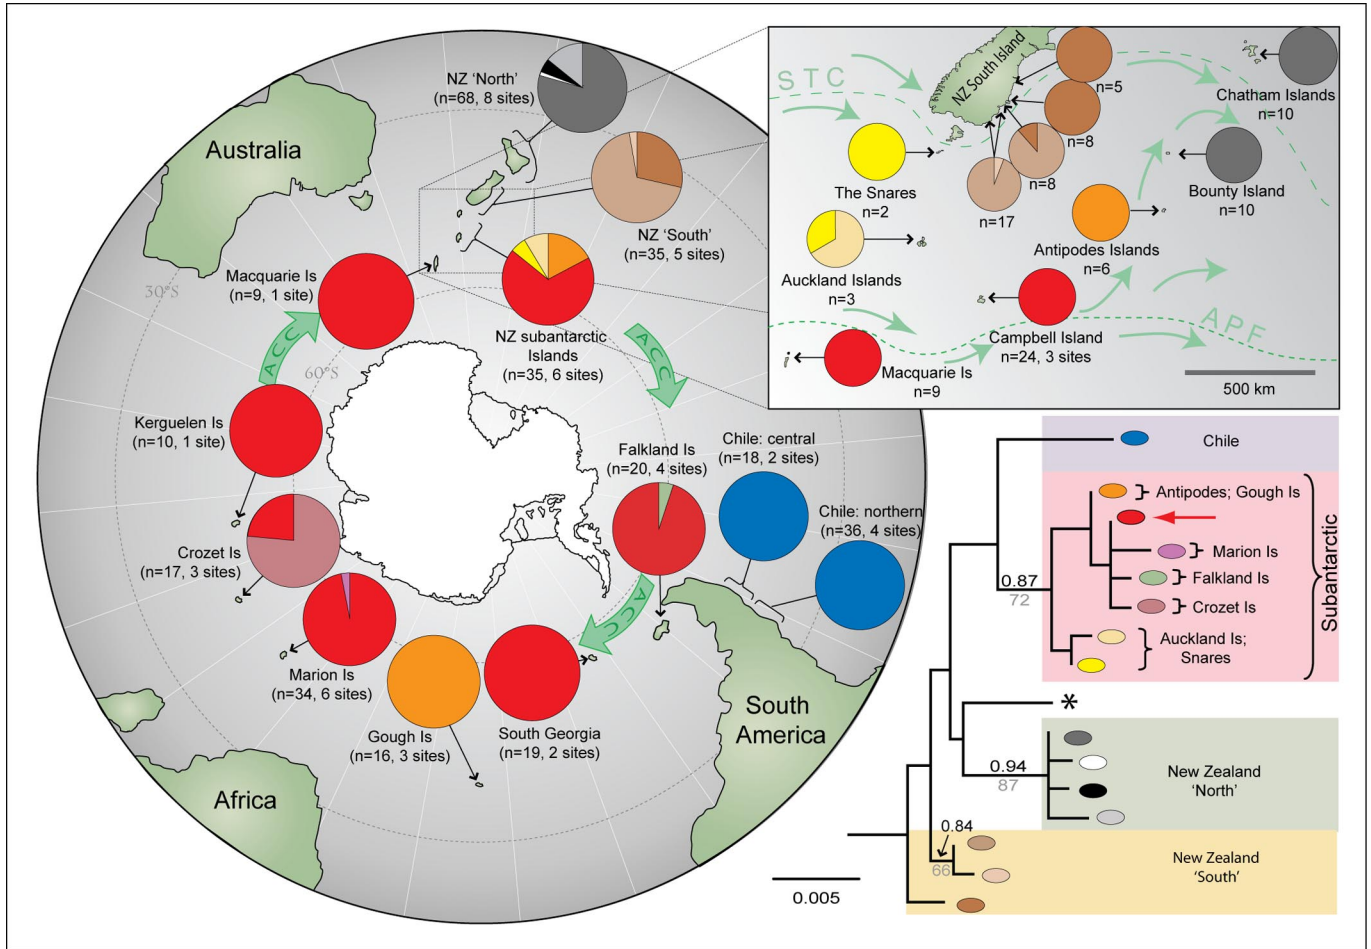

**Fig. S1.** Phylogeographic patterns within *D. antarctica* based on *rbcL* data. The phylogenetic tree (Lower Right) indicates haplotype relationships, with Bayesian PP values above branches and ML bootstraps below. Outgroup taxa have been removed for clarity. "NZ subantarctic" refers to the Snares, Auckland, Campbell, and Antipodes Islands. The morphologically and genetically distinct "cape" form of *D. antarctica*, recently identified by Fraser et al. [Fraser CI, Hay CH, Spencer HG, Waters JM (2009) Genetic and morphological analyses of the southern bull kelp *Durvillaea antarctica* (Phaeophyceae: Durvillaeales) in New Zealand reveal cryptic species. *J Phycol*, in press.] from southeastern New Zealand, is indicated by an asterisk. The global projection shows haplotype distributions and proportions at each locality. Diversity in the southern New Zealand region is illustrated at higher magnification (Inset, Upper Right). Green arrows show major surface currents.

Table S1. Number of individuals sequenced from each site

| Species                    | Clade               | Area              | Site(s)                          | No. COI | No. rbCL |
|----------------------------|---------------------|-------------------|----------------------------------|---------|----------|
| <i>D. potatorum</i>        | Outgroup            | Tasmania          | Numerous                         | 20      | 20       |
| <i>D. willana</i>          | Outgroup            | Southeastern NZ   | Numerous                         | 20      | 20       |
| <i>D. antarctica</i>       | "Cape" form         | Catlins           | Brighton                         | 27      | 27       |
| <i>D. antarctica</i>       | Chile: central      | Chile             | Bahia Mansa                      | 5       | 0        |
| <i>D. antarctica</i>       | Chile: central      | Chile             | Cucao                            | 10      | 9        |
| <i>D. antarctica</i>       | Chile: central      | Chile             | Loncoyen                         | 9       | 9        |
| <i>D. antarctica</i>       | Chile: northern     | Chile             | Constitucion                     | 6       | 9        |
| <i>D. antarctica</i>       | Chile: northern     | Chile             | Pichicuy                         | 10      | 8        |
| <i>D. antarctica</i>       | Chile: northern     | Chile             | Montemar                         | 10      | 10       |
| <i>D. antarctica</i>       | Chile: northern     | Chile             | Tumbes                           | 8       | 9        |
| <i>D. antarctica</i>       | New Zealand "North" | Bounty Islands    |                                  | 7       | 10       |
| <i>D. antarctica</i>       | New Zealand "North" | Cape Campbell     |                                  | 4       | 7        |
| <i>D. antarctica</i>       | New Zealand "North" | Chatham Islands   |                                  | 20      | 10       |
| <i>D. antarctica</i>       | New Zealand "North" | Auckland          | Maori Bay                        | 5       | 9        |
| <i>D. antarctica</i>       | New Zealand "North" | Gisborne          | Turihau Reef                     | 0       | 3        |
| <i>D. antarctica</i>       | New Zealand "North" | Kaikoura          | Raramai Tunnels                  | 5       | 10       |
| <i>D. antarctica</i>       | New Zealand "North" | Wellington        | Sandy Bay                        | 6       | 8        |
| <i>D. antarctica</i>       | New Zealand "South" | Catlins           | Tautuku and Brighton             | 11      | 17       |
| <i>D. antarctica</i>       | New Zealand "South" | Dunedin           | Second Beach                     | 8       | 8        |
| <i>D. antarctica</i>       | New Zealand "South" | Dunedin           | Taiaroa Heads                    | 8       | 8        |
| <i>D. antarctica</i>       | New Zealand "South" | Oamaru            | Moeraki                          | 4       | 5        |
| <i>D. antarctica</i>       | Subantarctic        | Antipodes Islands |                                  | 6       | 6        |
| <i>D. antarctica</i>       | Subantarctic        | Auckland Islands  | Enderby Island                   | 8       | 3        |
| <i>D. antarctica</i>       | Subantarctic        | Campbell Island   | Perseverance Harbour             | 10      | 11       |
| <i>D. antarctica</i>       | Subantarctic        | Campbell Island   | Capstan Cove                     | 8       | 8        |
| <i>D. antarctica</i>       | Subantarctic        | Campbell Island   | Monumental Harbour               | 4       | 5        |
| <i>D. antarctica</i>       | Subantarctic        | Crozet Islands    | Jardin Japonais                  | 5       | 6        |
| <i>D. antarctica</i>       | Subantarctic        | Crozet Islands    | Baie Américaine                  | 6       | 4        |
| <i>D. antarctica</i>       | Subantarctic        | Crozet Islands    | Baie du Marin                    | 6       | 7        |
| <i>D. antarctica</i>       | Subantarctic        | Falkland Islands  | Kidney Island and Cape Pembroke  | 12      | 9        |
| <i>D. antarctica</i>       | Subantarctic        | Falkland Islands  | Sea Lion Island                  | 12      | 11       |
| <i>D. antarctica</i>       | Subantarctic        | Falkland Islands  | New Island                       | 3       | 0        |
| <i>D. antarctica</i>       | Subantarctic        | South Georgia     | St Andrew's Bay                  | 9       | 9        |
| <i>D. antarctica</i>       | Subantarctic        | South Georgia     | Ocean Harbour                    | 10      | 10       |
| <i>D. antarctica</i>       | Subantarctic        | Gough Island      | Seal Beach                       | 6       | 6        |
| <i>D. antarctica</i>       | Subantarctic        | Gough Island      | The Glen                         | 8       | 9        |
| <i>D. antarctica</i>       | Subantarctic        | Gough Island      | Admirals                         | 8       | 1        |
| <i>D. antarctica</i>       | Subantarctic        | Kerguelen Island  | Port-Aux-Français                | 10      | 10       |
| <i>D. antarctica</i>       | Subantarctic        | Macquarie Island  |                                  | 10      | 9        |
| <i>D. antarctica</i>       | Subantarctic        | Marion Island     | Ship's Cove                      | 1       | 2        |
| <i>D. antarctica</i>       | Subantarctic        | Marion Island     | Storm Petrel Bay, near Repetto's | 5       | 5        |
| <i>D. antarctica</i>       | Subantarctic        | Marion Island     | Rook's Peninsula, Rook's Bay     | 6       | 8        |
| <i>D. antarctica</i>       | Subantarctic        | Marion Island     | Blowholes near Trypot Beach      | 8       | 8        |
| <i>D. antarctica</i>       | Subantarctic        | Marion Island     | Cape Davis                       | 2       | 1        |
| <i>D. antarctica</i>       | Subantarctic        | Marion Island     | Kildalkey Bay                    | 1       | 1        |
| <i>D. antarctica</i>       | Subantarctic        | Snares            |                                  | 2       | 2        |
| TOTAL <i>D. antarctica</i> |                     |                   |                                  | 329     | 327      |
